# Supplementary material
Source: PubMed Central journal article supplement (PMC7534587)
Supplement: ehp6263.smcontents.508.pdf [file ehp6263.smcontents.508.pdf]

**Note to readers with disabilities:** *EHP* strives to ensure that all journal content is accessible to all readers. However, some figures and Supplemental Material published in *EHP* articles may not conform to [508 standards](#) due to the complexity of the information being presented. If you need assistance accessing journal content, please contact [ehp508@niehs.nih.gov](mailto:ehp508@niehs.nih.gov). Our staff will work with you to assess and meet your accessibility needs within 3 working days.

### **Supplemental Material**

#### **Locus-Specific Differential DNA Methylation and Urinary Arsenic: An Epigenome-Wide Association Study in Blood among Adults with Low-to-Moderate Arsenic Exposure**

Anne K. Bozack, Arce Domingo-Relloso, Karin Haack, Mary V. Gamble, Maria Tellez-Plaza, Jason G. Umans, Lyle G. Best, Joseph Yracheta, Matthew O. Gribble, Andres Cardenas, Kevin A. Francesconi, Walter Goessler, Wan-Yee Tang, M. Daniele Fallin, Shelley A. Cole, and Ana Navas-Acien

#### **Table of Contents**

**Table S1.** Studies identified reporting the association between As exposure and DNA methylation measured using the 450K and 850K microarrays and included in the lookup approach.

**Table S2.** Descriptive characteristics for eligible participants and participants for DNA methylation analysis.

**Table S3.** Linear models for the association between ln(total urinary arsenic levels) and imputed cell type proportions.

**Table S4.** Differentially methylated CpG sites associated with ln(total urinary arsenic levels) at  $P_{\text{FDR}} < 0.05$ , and effects sizes and  $p$ -values stratified by sex.

**Table S5.** Differentially methylated CpG sites associated with ln(total urinary arsenic concentration) at  $P_{\text{FDR}} < 0.05$ , and effects sizes and  $p$ -values stratified by smoking status.

**Table S6.** Differentially methylated CpG sites associated with ln(total urinary arsenic concentration) at  $P_{\text{FDR}} < 0.05$ , and effects sizes and  $p$ -values stratified by study center.

**Table S7.** Differentially methylated CpG sites associated with ln(total urinary arsenic levels) at  $P_{\text{FDR}} < 0.05$ , and effects sizes and  $p$ -values stratified by diabetes status.

**Table S8.** Results of a linear model for the association between urinary As levels and M-values of cg14595618, annotated to *HK1*, including the interaction term  $\ln(\text{total urinary As}) \times \text{diabetes status}$  and adjusted age, sex, BMI, smoking status, education, study center (Arizona, Oklahoma, North and South Dakota), estimated glomerular filtration rate, and cell type proportion estimates.

**Table S9.** Differentially methylated CpG sites associated with  $\ln(\text{total urinary arsenic levels})$  at  $P_{\text{FDR}} < 0.05$  in our primary analyses, and results from sensitivity analyses performed on probe-type normalized data.

**Table S10.** Differentially methylated CpG sites associated with  $\ln(\text{total urinary arsenic levels})$  at  $P_{\text{FDR}} < 0.05$  in our primary analyses, and results from sensitivity analyses using ReFACToR, a reference-free approach to adjusted for cell type proportions.

**Figure S1.** Flowchart of eligible participant and participants selected for DNA methylation analysis.

**Figure S2.** Q-Q plot from *limma* models of M-values of  $\ln(\text{total urinary arsenic levels})$  adjusted for age, sex, BMI, self-reported smoking status, education (< high school, high school graduate or GED, > high school), study center (Arizona, Oklahoma, North and South Dakota), estimated glomerular filtration rate, and cell type proportion estimates.

**Figure S3.** Sensitivity analyses for probe-type normalization. Q-Q plot from *limma* models of M-values normalized using single sample Noob and RCP normalization adjusted for age, sex, BMI, self-reported smoking status, education (< high school, high school graduate or GED, > high school), study center (Arizona, Oklahoma, North and South Dakota), estimated glomerular filtration rate, and cell type proportion estimates.

**Figure S4.** Sensitivity analyses for reference-free cell type proportion adjustment. Q-Q plot from *limma* models of M-values adjusted for age, sex, BMI, self-reported smoking status, education (< high school, high school graduate or GED, > high school), study center (Arizona, Oklahoma, South Dakota), estimated glomerular filtration rate, and six ReFACToR components.

## References

**Additional File-** Excel Document
